# Supplementary material
Source: PubMed Central journal article supplement (PMC5518273)
Supplement: bi7b00432_si_001.pdf [file bi7b00432_si_001.pdf]

## **SUPPORTING INFORMATION**

### **Hole Hopping through Tryptophan in Cytochrome P450**

Maraia E. Ener,<sup>†</sup> Harry B. Gray,\* and Jay R. Winkler\*

Beckman Institute, California Institute of Technology, Pasadena, California 91125, United States

<sup>†</sup>Current address:

Department of Chemistry  
Yale University  
225 Prospect St.  
P.O. Box 208107  
New Haven CT 06520

#### **Corresponding Authors**

\*Harry B. Gray. \*Jay R. Winkler

## Additional Experimental Details

**Laser transient spectroscopy.** Excitation pulse energies were in the range of 5-10 mJ/pulse. Samples were held in cuvettes with 1- cm optical path lengths and the absorbance at the 480-nm excitation wavelength was approximately 0.15.

The transient kinetics shown in manuscript Figures 3 and 4 are normalized to the prompt bleach at 440 nm. This bleach signal corresponds to formation of the  $^*Ru^{2+}$  excited state. By normalizing to the initial excited state concentration, the signals for the different proteins reflect the relative yields of subsequent intermediates that form.

**Sample spectra.** Absorption spectra of  $[Ru(bpy)_2(lAphen)]^{2+}$ , CYP102A1,  $Ru_{C97}(CYP102A1)W96$ , and  $pMeODMA^{*+}$  have been reported previously.<sup>1,2</sup>

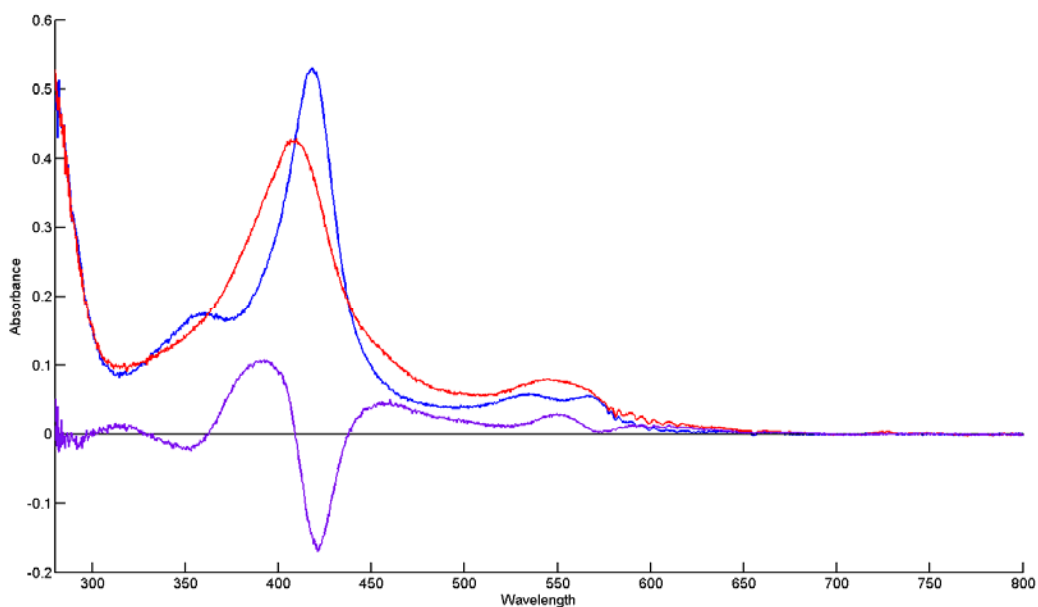

**Figure S1.** Spectra of ferric (blue) and ferrous (red) wild-type P450-BM3, and the ferrous - ferric difference spectrum (purple).

## Electron Transfer Rate Calculations

Electron-transfer rate constants were estimated using the following semiclassical expression:<sup>3</sup>

$$k_{\text{ET}} = (10^{13} \text{ s}^{-1}) \times e^{-\beta(r-r_0)} \times e^{-\frac{(\Delta G^\circ + \lambda)^2}{4\lambda k_B T}}$$

The following parameters were used for all estimated rate constants in Table S1:  $\beta = 1.1 \text{ \AA}^{-1}$ ;  $r_0 = 3 \text{ \AA}$ ;  $\lambda = 0.8 \text{ eV}$ ;  $k_B = 8.6165 \times 10^{-5} \text{ eV K}^{-1}$ ;  $T = 295 \text{ K}$ .

**Table S1.** Estimated electron transfer rate constants

| Reaction                                                                                                                       | $\Delta G^\circ$ , eV | $r$ , $\text{\AA}$ | $k_{\text{ET}}$ , $\text{s}^{-1}$ | $\tau_{\text{ET}} = k_{\text{ET}}^{-1}$ |
|--------------------------------------------------------------------------------------------------------------------------------|-----------------------|--------------------|-----------------------------------|-----------------------------------------|
| $\text{Ru}_{\text{C97}}^{3+}\text{-Fe}^{3+}\text{P} \rightarrow \text{Ru}_{\text{C97}}^{2+}\text{-Fe}^{3+}\text{P}^{*\bullet}$ | -0.2                  | 20.8               | $3.8 \times 10^2$                 | 2.7 ms                                  |
| $\text{Ru}_{\text{C97}}^{3+}\text{-W96} \rightarrow \text{Ru}_{\text{C97}}^{2+}\text{-W96}^{*\bullet}$                         | -0.1                  | 11.88              | $1.4 \times 10^6$                 | 0.7 $\mu\text{s}$                       |
| $\text{W96}^{*\bullet}\text{-Fe}^{3+}\text{P} \rightarrow \text{W96}\text{-Fe}^{3+}\text{P}^{*\bullet}$                        | -0.1                  | 7.15               | $2.5 \times 10^8$                 | 4 ns                                    |
| $\text{Ru}_{\text{C97}}^{3+}\text{-Fe}^{3+}\text{P} \rightarrow \text{Ru}_{\text{C97}}^{2+}\text{-Fe}^{2+}\text{P}$            | -0.9                  | 19.5               | $1.2 \times 10^5$                 | 8.6 $\mu\text{s}$                       |
| $\text{Ru}_{\text{C97}}^{3+}\text{-Fe}^{3+}\text{P} \rightarrow \text{Ru}_{\text{C97}}^{2+}\text{-Fe}^{2+}\text{P}$            | -0.9                  | 23.8               | $1.0 \times 10^3$                 | 1 ms                                    |

## References

- [1] Ener, M. E., Lee, Y. T., Winkler, J. R., Gray, H. B., and Cheruzel, L. (2010) Photooxidation of cytochrome P450-BM3, *Proc. Natl. Acad. Sci. USA* 107, 18783-18786.
- [2] Sassoon, R. E., Gershuni, S., and Rabani, J. (1992) Photochemical generation and consequent stabilization of electron-transfer products on separate like-charged polyelectrolytes, *J. Phys. Chem.* 96, 4692-4698.
- [3] Winkler, J. R., and Gray, H. B. (2014) Electron Flow through Metalloproteins, *Chem. Rev.* 114, 3369-3380.
